# Supplementary material for: The Bad Thing About Good Advice: Understanding When and How Advice Exacerbates Overconfidence
Source: Atypon-hosted journal article supplement (doi:10.1287/mnsc.2021.3987), 2021-07-28
Supplement: mnsc.2021.3987.sm2.zip [file Data dictionary for consolidated data.pdf › Data and Code/Data/Data dictionary for consolidated data.pdf]

| Variable                                       | Name       | Measurement units | Allowed values                                                                   | Description                                                                                                                                                                                                                                                                                                                                                                       |
|------------------------------------------------|------------|-------------------|----------------------------------------------------------------------------------|-----------------------------------------------------------------------------------------------------------------------------------------------------------------------------------------------------------------------------------------------------------------------------------------------------------------------------------------------------------------------------------|
| Study                                          | Study      | text              | Concatenation of "Food" or "Age" and "Prob", "Miss", or "Quant", e.g. "FoodProb" | The study that provided the data. Note that "quant" refers to percentiles studies.                                                                                                                                                                                                                                                                                                |
| Stimulus Type                                  | StimType   | text              | "Food" or "Age"                                                                  | The type of stimulus used                                                                                                                                                                                                                                                                                                                                                         |
| Elicitation Type                               | ElicitType | text              | "Prob", "Miss", or "Quant"                                                       | The type of confidence elicitation used. Note that "quant" refers to percentiles studies.                                                                                                                                                                                                                                                                                         |
| Subject Number                                 | Subject    | numeric           | 1 to number of subjects in the study                                             | Subject number for the study. Note that subject numbers are repeated across studies.                                                                                                                                                                                                                                                                                              |
| Subject Age                                    | Age        | numeric           |                                                                                  |                                                                                                                                                                                                                                                                                                                                                                                   |
| Subject Gender                                 | Female     | numeric           | 0 = male; 1 = female; 2 = other                                                  | "Other" option not available for food probability correct                                                                                                                                                                                                                                                                                                                         |
| Stimulus Number                                | StimNum    | numeric           | 1 to number of stimuli in the study                                              | The unique identifier number assigned to each stimulus in a study. Note that stimulus numbers repeat across stimuli (e.g., there is a food photo #1 and an age photo #1) but they are the same for all studies with the same stimuli (e.g., age photo #1 with probability elicitation is the same as age photo #1 with MISS elicitation)                                          |
| Trial                                          | Trial      | numeric           | 1 to number of trials per subject in the study                                   | The trial number for this observation. There were 5 trials for probability and MISS elicitations, 3 trials for percentiles elicitation.                                                                                                                                                                                                                                           |
| Advisor Rank                                   | Rank       | numeric           | 1 to 200                                                                         | The accuracy rank of the advisor on a separate set of trials. 1 = best, 200 = worst.                                                                                                                                                                                                                                                                                              |
| Advisor Rank Category                          | RankCat    | numeric           | 1 to 5                                                                           | A categorized ranking. 1 = 1 to 40, 2 = 41 to 80 and so on.                                                                                                                                                                                                                                                                                                                       |
| Advisor Rank Label                             | RankLab    | text              | "1. Advisor Rank 1-40" and so on                                                 | Labels for the categorized ranking, e.g., "1. Advisor Rank 1-40" and so on.                                                                                                                                                                                                                                                                                                       |
| Truth                                          | Truth      | numeric           |                                                                                  |                                                                                                                                                                                                                                                                                                                                                                                   |
| Advice                                         | Advice     | numeric           |                                                                                  |                                                                                                                                                                                                                                                                                                                                                                                   |
| Criterion                                      | Criterion  | numeric           | 2, 5, or 8 (years) for Ages; 200 (calories) for Foods                            | The criterion used in the question "Probability within X?" when eliciting confidence for probability studies. Takes the value NA for all other elicitation methods.                                                                                                                                                                                                               |
| Best Estimate: Initial                         | Init       | numeric           |                                                                                  | The initial best estimate provided by the participant (prior to seeing advice)                                                                                                                                                                                                                                                                                                    |
| Best Estimate: Final                           | Fin        | numeric           |                                                                                  | The final best estimate provided by the participant (after seeing advice)                                                                                                                                                                                                                                                                                                         |
| Mean Estimate: Initial                         | Mean_I     | numeric           |                                                                                  | The mean initial estimate. For probability correct and MISS studies this is the same as Best Estimate: Initial. For percentiles studies, this is calculated from the five estimates provided.                                                                                                                                                                                     |
| Mean Estimate: Final                           | Mean_F     | numeric           |                                                                                  | The mean final estimate. For probability correct and MISS studies this is the same as Best Estimate: Final. For percentiles studies, this is calculated from the five estimates provided.                                                                                                                                                                                         |
| Standard Deviation of Estimate: Initial        | SD_I       | numeric           | Any result of the calculation                                                    |                                                                                                                                                                                                                                                                                                                                                                                   |
| Standard Deviation of Estimate: Final          | SD_F       | numeric           | Any result of the calculation                                                    |                                                                                                                                                                                                                                                                                                                                                                                   |
| Expected Absolute Deviation: Initial           | EAD_I      | numeric           | Any result of the calculation (probability and percentiles studies)              | The participant's expectation of the absolute deviation between the Truth and their Best Estimate: Initial. For MISS studies, this is reported directly. For probability correct and quantile studies this is calculated.                                                                                                                                                         |
| Expected Absolute Deviation: Final             | EAD_F      | numeric           | Any result of the calculation (probability and percentiles studies)              | The participant's expectation of the absolute deviation between the Truth and their Best Estimate: Final. For MISS studies, this is reported directly. For probability correct and quantile studies this is calculated.                                                                                                                                                           |
| Expected Absolute Deviation from Mean: Initial | EAD_Mean_I | numeric           | Any result of the calculation (probability and percentiles studies)              | The participant's expectation of the absolute deviation between the Truth and their <b>Mean</b> Estimate: Initial. For MISS studies, this is reported directly. For probability correct and quantile studies this is calculated. For probability and MISS studies this is the same as the EAD using the Best Estimate: Initial, because the distribution is assumed to be normal. |
| Expected Absolute Deviation from Mean: Final   | EAD_Mean_F | numeric           | Any result of the calculation (probability and percentiles studies)              | The participant's expectation of the absolute deviation between the Truth and their <b>Mean</b> Estimate: Final. For MISS studies, this is reported directly. For probability correct and quantile studies this is calculated. For probability and MISS studies this is the same as the EAD using the Best Estimate: Final, because the distribution is assumed to be normal.     |
| Absolute Deviation: Initial                    | AD_I       | numeric           | Any result of the calculation                                                    |                                                                                                                                                                                                                                                                                                                                                                                   |

|                                                   |            |         |                                                                                            |                                       |
|---------------------------------------------------|------------|---------|--------------------------------------------------------------------------------------------|---------------------------------------|
| Absolute Deviation: Final                         | AD_F       | numeric | Any result of the calculation                                                              |                                       |
| Absolute Deviation: Advice                        | AD_A       | numeric | Any result of the calculation                                                              |                                       |
| Absolute Deviation: Average of Initial and Advice | AD_Avg     | numeric | Any result of the calculation                                                              |                                       |
| Overconfidence: Initial                           | OC_I       | numeric | Any result of the calculation                                                              |                                       |
| Overconfidence: Final                             | OC_F       | numeric | Any result of the calculation                                                              |                                       |
| Change in Overconfidence                          | OC_Change  | numeric | Any result of the calculation                                                              |                                       |
| Expected Improvement                              | ExpImprove | numeric | Any result of the calculation                                                              |                                       |
| Actual Improvement                                | Improve    | numeric | Any result of the calculation                                                              |                                       |
| Distance Between Initial and Advice               | DistIA     | numeric | Any result of the calculation                                                              |                                       |
| Bracketing Rate                                   | Bracket    | numeric | Any result of the calculation                                                              |                                       |
| IOA Confidence Change                             | IOA_CC     | numeric | Any result of the calculation                                                              |                                       |
| IOA Mean Shift                                    | IOA_MS     | numeric | Any result of the calculation                                                              |                                       |
| IOA Total                                         | IOA_TOT    | numeric | Any result of the calculation                                                              |                                       |
| IOA Confidence Change Trimmed                     | IOA_CCT    | numeric | Any result of the calculation                                                              | IOA_CC trimmed at -1 and 1            |
| IOA Mean Shift Trimmed                            | IOA_MSt    | numeric | Any result of the calculation                                                              | IOA_MS trimmed at -1 and 1            |
| IOA Total Trimmed                                 | IOA_TOTt   | numeric | Any result of the calculation                                                              | IOA_TOT trimmed at -1 and 1           |
| Probability Correct Estimate: Initial             | Prob_I     | numeric | 0 to 100 in increments of 5; only reported for probability correct studies, "NA" otherwise |                                       |
| Probability Correct Estimate: Final               | Prob_F     | numeric | 0 to 100 in increments of 5; only reported for probability correct studies, "NA" otherwise |                                       |
| MISS Estimate: Initial                            | MISS_I     | numeric | 0 to 25 (ages) or 1000 (calories), only reported for MISS studies, "NA" otherwise          |                                       |
| MISS Estimate: Final                              | MISS_F     | numeric | 0 to 25 (ages) or 1000 (calories), only reported for MISS studies, "NA" otherwise          |                                       |
| Percentiles Minimum Estimate: Initial             | QMin_I     | numeric | only reported for percentiles studies, "NA" otherwise                                      |                                       |
| Percentiles Minimum Estimate: Final               | QMin_F     | numeric | only reported for percentiles studies, "NA" otherwise                                      |                                       |
| Percentiles Low Estimate: Initial                 | QLow_I     | numeric | only reported for percentiles studies, "NA" otherwise                                      |                                       |
| Percentiles Low Estimate: Final                   | QLow_F     | numeric | only reported for percentiles studies, "NA" otherwise                                      |                                       |
| Percentiles High Estimate: Initial                | QHigh_I    | numeric | only reported for percentiles studies, "NA" otherwise                                      |                                       |
| Percentiles High Estimate: Final                  | QHigh_F    | numeric | only reported for percentiles studies, "NA" otherwise                                      |                                       |
| Percentiles Maximum Estimate: Initial             | QMax_I     | numeric | only reported for percentiles studies, "NA" otherwise                                      |                                       |
| Percentiles Maximum Estimate: Final               | QMax_F     | numeric | only reported for percentiles studies, "NA" otherwise                                      |                                       |
| WOA                                               | WOA        | numeric | any result of the calculation                                                              | weight of advice                      |
| WOA Trimmed                                       | WOAt       | numeric | any result of the calculation                                                              | weight of advice, trimmed at -1 and 1 |

|                                    |          |         |                               |  |
|------------------------------------|----------|---------|-------------------------------|--|
| Rank, Mean Centered                | Rankc    | numeric | any result of the calculation |  |
| Rank, Centered at Rank = 25        | Rank25c  | numeric | any result of the calculation |  |
| Rank, Centered at Rank = 175       | Rank175c | numeric | any result of the calculation |  |
| Truth, Mean Centered               | Truthc   | numeric | any result of the calculation |  |
| DistIA, Mean Centered              | DistIAc  | numeric | any result of the calculation |  |
| DistIA centered at 10th percentile | Dist10c  | numeric | any result of the calculation |  |
| DistIA centered at 90th percentile | Dist90c  | numeric | any result of the calculation |  |
|                                    |          |         |                               |  |
